# Supplementary material for: YouTube and Bilibili as sources of information on oral cancer: cross-sectional content analysis study
Source: Research Square preprint supplement (doi:10.21203/rs.3.rs-5658353/v1), 2024-12-27
Supplement: Supplementary file 1 [file 3f60b1e746c8f4f2e2468f37.docx]

**1.mDISCERN** Modified DISCERN

The score of each question ranges from 0 to 1. The total score is 0 to 5.

mDISCERN-1 Are the aims clear and achieved?

0-no 1-yes

mDISCERN-2 Are reliable sources of information used?

0-no 1-yes

mDISCERN-3 Is the information presented balanced and unbiased?

0-no 1-yes

mDISCERN-4 Are additional sources of information listed for patient reference?

0-no 1-yes

mDISCERN-5 Are areas of uncertainty mentioned?

1. no 1-yes

Advantage: ① Quick. ② Wide use.

Disadvantage: ① Readability and flow are not included. ② Limited questions. ③ Limited choice (only offering “no” or “yes” ).

**2.GQS** Global Quality Score

The total score is 1 to 5.

【Score 1】Poor quality, poor flow of the site, most information missing, not at all useful for patients.

【Score 2】Generally poor quality and poor flow, some information listed but many important topics missing.of very limited use to patients

【Score 3】Moderate quality, suboptimal flow, some important information is adequately discussed but others poorly discussed, somewhat useful for patients

【Score 4】Good quality and generally good flow, most of the relevant information is listed.but some topics not covered, useful for patients

【Score 5】Excellent quality and excellent flow, very useful for patients

Advantage: ① Quick. ② Widest use.

Disadvantage: ① Limited questions. ② Not quantified clearly.

**3.VIQI** Video Information and Quality Index.

The score of each question ranges from 1 to 5. The total score is 5 to 20.

【VIQI 1】 information flow

*The VIQI 1 in our study is according to thumbs-up, because the data of thumbs-up are available from all the three platforms.

1 ＜10 thumbs-up

2 ＜100 thumbs-up

3 ＜1000 thumbs-up

4 ＜10000 thumbs-up

5 ≥10000 thumbs-up

* If a video turns off the buttom of thumbs-up (very few would do this), we rate its flow by views.

1 ＜100 views

2 ＜1000 views

3 ＜10000 views

4 ＜100000 views

5 ≥100000 views

【VIQI 2】 information accuracy

【VIQI 3】quality (videos including one point for each image, animation, interview, video captions, and summary)

【VIQI 4】 precision (level of coherence between video title and content)

Advantage: ① Quick. ② Supplement for GQS.

Disadvantage: ① Limited questions. ② Not quantified clearly (we have quantified VIQI-1, but VIQI-2 and VIQI-4 can not be quantified). ③ Not wide use.

**4.PEMAT** Patient education materials assessment tool

Because of the complexity of this tool, it can not be shown in the Word, more details shown in the Excel (Additional file 3, or http://www.ahrq.gov/pemat ).

Advantage: ① Most detailed tool. ② Wide use. ③ Reliability and validity confirmed.

Disadvantage: ① Complex and time-consuming. ② “NA (non-applicable)” items potentially resulting inflating score.
